# Supplementary material
Source: PubMed Central journal article supplement (PMC4912463)

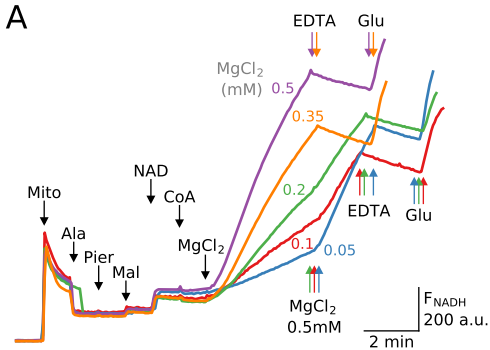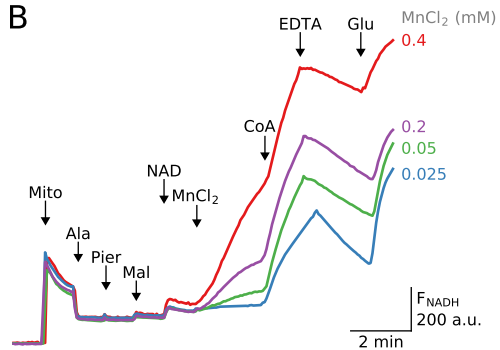

Supplement: NIHMS780215-supplement-1.pdf [file NIHMS780215-supplement-1.pdf]

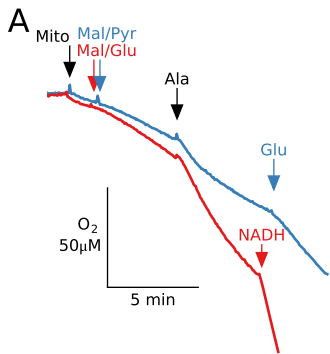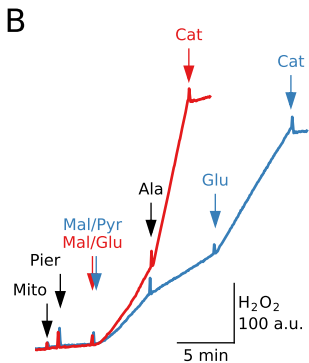

Supplement: NIHMS780215-supplement-2.pdf [file NIHMS780215-supplement-2.pdf]

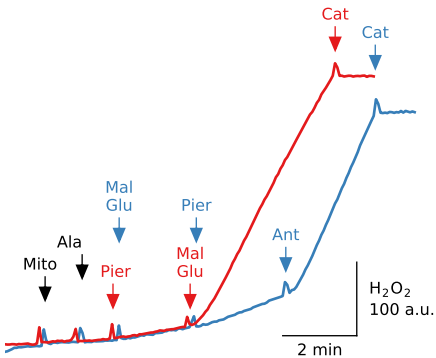

Supplement: NIHMS780215-supplement-3.pdf [file NIHMS780215-supplement-3.pdf]
